# Supplementary material for: Coronavirus testing indicates transmission risk increases along wildlife supply chains for human consumption in Viet Nam, 2013-2014
Source: PubMed Central journal article supplement (PMC7416947; doi:10.1371/journal.pone.0237129), 2020-08-10
Supplement: pone.0237129.s002.pdf [file pone.0237129.s002.pdf]

**S2 Table: Multivariate mixed effect logistic regression showing the association between season and sub-interface with coronavirus positives in field rats.**

| <b>Variables</b> | <b>Categories</b> | <b>Odds Ratio</b> | <b>95% CI</b> | <b>P-value</b> |
|------------------|-------------------|-------------------|---------------|----------------|
| Season           | Dry               | 1.0               |               |                |
|                  | Wet               | 4.9               | 1.4 - 18.0    | <0.01          |
| Sub-interface    | Rat trader        | 1.0               |               |                |
|                  | Large market      | 2.2               | 1.0 - 4.8     | 0.0326         |
|                  | Restaurant        | 10.0              | 2.7 - 39.5    | <0.01          |

Site was used as grouping variable (i.e. random effect).
